# Supplementary material for: Exploring the mechanistic link between corticosterone and insulin-like growth factor-1 in a wild passerine bird
Source: PeerJ. 2018 Dec 14;6:e5936. doi: 10.7717/peerj.5936 (PMC6296332; doi:10.7717/peerj.5936)
Supplement: Data S1 — In this file we present the data from our corticosterone manipulation study. IGF-1 and corticosterone values are in ng/ml, and mass are in gram. In the ’treatment’ variable ‘C’, ‘L’, ‘H’ mean ‘Control’ ‘Low’ and ‘High’ corticosterone group, respectively. ‘Block’ denotes the experimental blocks (every block contained one bird from each treatment group). ‘Round’ denotes the first or the second replicate of the treatments. [file peerj-06-5936-s001.xlsx]

## Sheet: experiment
ring	treatment	date.exp	enteraviary	block	round	sex	boxopen	bleed	mass	cort	igf1
K644624	C	2018-03-18	08:29:13	7	2	F	08:51:11	08:52:33	13.6	3.94564	47.0289
K644624	H	2017-03-10	08:30:33	4	1	F	08:54:18	08:55:45	13.1	64.4358	36.1786
K644632	L	2017-03-17	08:24:42	4	2	M	08:42:59	08:45:54	13.4	24.964	67.3586
K644632	C	2017-03-11	08:11:29	5	1	M	08:30:08	08:31:32	13.9	5.04979	46.4269
K644638	H	2017-03-17	08:24:42	6	2	M	08:53:21	08:54:29	14.2	74.8868	48.9314
K644638	C	2017-03-11	08:11:29	7	1	M	08:37:22	08:39:59	13.7	2.33629	56.5486
K644714	C	2017-03-10	08:30:33	4	1	M	08:52:21	08:54:24	14.6	3.39042	49.1058
K644714	H	2018-03-18	08:29:13	7	2	M	08:48:09	08:50:47	16	70.1734	40.499
K644830	C	2017-03-16	08:25:38	2	2	M	08:43:27	08:45:22	14.4	10.8736	47.0855
K644830	H	2017-03-09	08:26:32	2	1	M	09:08:05	09:10:07	14.2	30.9069	42.4595
K644831	C	2017-03-09	08:26:32	1	1	F	08:43:07	08:44:35	13.5	3.75486	51.5927
K644831	L	2017-03-15	08:26:54	1	2	F	08:55:19	08:57:08	14.3	25.2926	43.4045
K644832	C	2018-03-18	08:29:13	8	2	M	08:44:14	08:45:30	13.5	6.13558	58.2265
K644832	L	2017-03-11	08:11:29	7	1	M	08:35:23	08:36:45	13.5	21.811	59.2937
K644833	C	2017-03-15	08:26:54	1	2	F	08:44:18	08:45:46	14.8	3.91958	33.7139
K644833	H	2017-03-09	08:26:32	1	1	F	08:48:21	08:49:16	14.1	29.6895	55.7006
K644834	L	2017-03-09	08:26:32	1	1	F	08:45:11	08:47:56	13.4	7.99954	49.928
K644834	H	2017-03-15	08:26:54	1	2	F	08:45:08	08:47:27	13.6	42.0977	62.0756
K644835	L	2017-03-09	08:26:32	2	1	M	09:05:07	09:07:02	14.2	27.9853	69.4016
K644835	H	2017-03-16	08:25:38	2	2	M	08:42:34	08:43:50	14.7	85.6619	61.448
K644836	L	2017-03-11	08:11:29	5	1	M	08:29:22	08:31:03	14.1	4.38054	49.6789
K644836	H	2017-03-17	08:24:42	4	2	M	08:46:38	08:47:54	14.2	33.2414	66.2407
K644837	C	2017-03-10	08:30:33	3	1	M	08:48:48	08:50:31	13.8	5.68022	55.3068
K644837	L	2017-03-16	08:25:38	3	2	M	08:50:25	08:51:53	14.2	8.41407	36.9239
K644839	L	2018-03-18	08:29:13	7	2	M	08:45:55	08:47:47	13.7	29.7439	63.6655
K644839	L	2017-03-10	08:30:33	4	1	M	09:00:50	09:05:24	14.4	48.5307	39.9956
K644841	C	2017-03-17	08:24:42	4	2	M	08:44:21	08:46:16	14.5	3.05559	53.6235
K644841	H	2017-03-11	08:11:29	5	1	M	08:31:25	08:32:37	14.5	58.5782	43.0449
K644842	L	2017-03-16	08:25:38	2	2	F	08:41:40	08:42:52	14.4	29.6895	48.1982
K644842	C	2017-03-09	08:26:32	2	1	F	09:10:57	09:12:23	13.4	3.89623	54.8464
K644845	H	2017-03-17	08:24:42	5	2	M	08:50:55	08:51:53	14.7	5.36879	52.5012
K644845	C	2017-03-11	08:11:29	6	1	M	08:33:24	08:34:46	14.9	1.34504	47.4708
K644846	H	2017-03-11	08:11:29	7	1	F	08:36:03	08:37:24	16.9	84.863	43.6425
K644846	L	2017-03-17	08:24:42	6	2	F	08:57:33	08:59:17	17	25.1347	55.5855
K644848	L	2017-03-11	08:11:29	6	1	M	08:34:13	08:35:36	14.5	29.315	47.9341
K644848	C	2017-03-17	08:24:42	5	2	M	08:48:30	08:50:37	14.6	10.5845	73.1176
K644849	H	2017-03-16	08:25:38	3	2	F	08:51:27	08:52:51	16.1	9.00186	73.6845
K644849	L	2017-03-10	08:30:33	3	1	M	08:51:03	08:53:36	16	36.6475	47.4708
K644850	H	2017-03-10	08:30:33	3	1	F	08:48:02	08:51:25	14.9	39.1654	65.3406
K644850	C	2017-03-16	08:25:38	3	2	M	08:47:08	08:49:22	16.1	13.5886	66.0258
K644856	H	2017-03-11	08:11:29	6	1	F	08:32:02	08:33:31	14	54.4906	58.3022
K644856	L	2017-03-17	08:24:42	5	2	F	08:47:20	08:50:25	14.3	14.8585	48.2248
