# Supplementary material for: Exploring the mechanistic link between corticosterone and insulin-like growth factor-1 in a wild passerine bird
Source: PeerJ. 2018 Dec 14;6:e5936. doi: 10.7717/peerj.5936 (PMC6296332; doi:10.7717/peerj.5936)
Supplement: Data S2 — In this file we present the data from our field study. IGF-1 and corticosterone values are in ng/ml and mass are in gram. During handling 3 birds escaped before weighing, therefore their body mass values are missing. [file peerj-06-5936-s002.xlsx]

## Sheet: field
handling	igf1	cort	ring	sex	mass
baseline	70.0925	3.41558	K551909	M	15.4
stress	68.7028	8.63814	K551909	M	15.4
baseline	71.7076	1.31957	K551910	M	14.4
stress	61.588	3.15298	K551910	M	14.4
stress	59.1778	2.20415	K551915	F
baseline	72.6204	1.14496	K551915	F
stress	73.3114	3.94155	K551916	M	14.5
baseline	76.9129	1.56548	K551916	M	14.5
baseline	59.483	1.6846	K551918	F	14.5
stress	53.0175	4.56459	K551918	F	14.5
baseline	47.0766	1.82774	K551906	F	14.9
stress	38.5424	5.02288	K551906	F	14.9
stress	73.1081	1.73209	K551904	F
baseline	76.4629	0.240602	K551904	F
baseline	64.6583	3.10661	K551905	M	15.9
stress	52.225	6.82783	K551905	M	15.9
baseline	76.2649	4.03573	K551919	M	16.3
stress	63.4886	7.9254	K551919	M	16.3
baseline	56.6688	4.62708	K551921	F	14.1
stress	50.4861		K551921	F	14.1
baseline	68.0386	4.49656	K551926	M	15.1
stress	65.5192	3.05902	K551926	M	15.1
baseline	46.6128	1.79122	K551929	F	16.4
stress	40.8715	7.49454	K551929	F	16.4
stress	59.0182	5.73351	K551930	F	15.6
baseline	71.3902		K551930	F	15.6
stress	72.2385	6.81541	K551941	M	16
baseline	70.6317	5.72571	K551941	M	16
stress	54.3713	11.0358	K551942	M	16.3
baseline	59.1451	6.82804	K551942	M	16.3
baseline	72.8682	6.42188	K551944	M	15.9
stress	63.5808	8.02593	K551944	M	15.9
baseline	65.2476	2.14507	K551947	M
stress	54.3013	3.82956	K551947	M
